# Supplementary material for: Nonrandom domain organization of the Arabidopsis genome at the nuclear periphery
Source: Genome Res. 2017 Jul;27(7):1162–73. doi: 10.1101/gr.215186.116 (PMC5495068; doi:10.1101/gr.215186.116)
Supplement: Supplemental Material [file supp_gr.215186.116_Supplemental_Table_S2.xlsx]

## Sheet: root_7D
chromosome

## Sheet: leaf_7D
chromosome

## Sheet: leaf_30D
chromosome

## Sheet: inflorescence
chromosome
